# Supplementary material for: Towards variance-conserving reconstructions of climate indices with Gaussian process regression in an embedding space
Source: Copernicus journal article supplement (doi:10.5194/gmd-17-1765-2024), 2024-02-28
Supplement: Supplementary file 1 [file gmd-17-1765-2024-supplement.zip]

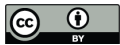

## *Supplement of*

# **Towards variance-conserving reconstructions of climate indices with Gaussian process regression in an embedding space**

**Marlene Klockmann et al.**

*Correspondence to:* Marlene Klockmann ([marlene.klockmann@uni-hamburg.de](mailto:marlene.klockmann@uni-hamburg.de))

- [gmd-17-1765-2024-supplement-title-page.pdf](#)
- [supplement\\_GMD\\_Klockmann\\_et al](#)
  - Data
    - \* [ccsm4](#)
    - \* [gpreg](#)
    - \* [mpiesm](#)
    - \* [prox](#)
  - [README.txt](#)
  - [amv0\\_select\\_pseudoprox\\_150yrs.py](#)
  - [amv1\\_prepare\\_virtual\\_space\\_150yrs.py](#)
  - [amv2\\_gp\\_in\\_virtual\\_space\\_monitor.py](#)
  - [emGPR\\_TCppp\\_MPIESM.job](#)
  - [redmod.env](#)
  - [redmod\\_gpu.env](#)

The copyright of individual parts of the supplement might differ from the article licence.
